# Supplementary material
Source: publisher site journal article supplement (https://www.dovepress.com/get_supplementary_file.php?f=342504.docx)

**Supplementary materials**

**Table S1:** Analysis of variance of the final models for measured responses.

| **Parameters** | **SS** | **DF** | **MS** | **F** | **p-value** | **Parameters** | **SS** | **DF** | **MS** | **F** | **p-value** |
| --- | --- | --- | --- | --- | --- | --- | --- | --- | --- | --- | --- |
| **VS** |  |  |  |  |  | **ZP** |  |  |  |  |  |
| **Model** | 35271.82 | 7 | 5038.83 | 248.45 | < 0.0001 | **Model** | 510.75 | 4 | 127.69 | 901.61 | < 0.0001 |
| X1 | 55.92 | 1 | 55.92 | 2.76 | 0.1479 | X1 | 10.58 | 1 | 10.58 | 74.71 | < 0.0001 |
| X2 | 30863.70 | 1 | 30863.70 | 1521.83 | < 0.0001 | X2 | 475.86 | 1 | 475.86 | 3360.12 | < 0.0001 |
| X3 | 406.22 | 1 | 406.22 | 20.03 | 0.0042 | X3 | 1.20 | 1 | 1.20 | 8.48 | 0.0172 |
| X1X3 | 1.44 | 1 | 1.44 | 0.0710 | 0.7988 | X22 | 23.10 | 1 | 23.10 | 163.13 | < 0.0001 |
| X12 | 77.18 | 1 | 77.18 | 3.81 | 0.0989 | **Residual** | 1.27 | 9 | 0.1416 |  |  |
| X22 | 1468.53 | 1 | 1468.53 | 72.41 | 0.0001 | Lack of Fit | 1.25 | 8 | 0.1568 | 7.84 | 0.2698 |
| X12X3 | 436.45 | 1 | 436.45 | 21.52 | 0.0035 | Pure Error | 0.0200 | 1 | 0.0200 |  |  |
| **Residual** | 121.68 | 6 | 20.28 |  |  | **Cor Total** | 512.02 | 13 |  |  |  |
| Lack of Fit | 88.88 | 5 | 17.78 | 0.5419 | 0.7676 |  |  |  |  |  |  |
| Pure Error | 32.80 | 1 | 32.80 |  |  |  |  |  |  |  |  |
| **Cor Total** | 35393.50 | 13 |  |  |  |  |  |  |  |  |  |
|  |  |  |  |  |  |  |  |  |  |  |  |
| **Parameters** | **SS** | **DF** | **MS** | **F** | **p-value** |  |  |  |  |  |  |
| **EE** |  |  |  |  |  |  |  |  |  |  |  |
| **Model** | 1721.54 | 6 | 286.92 | 341.00 | < 0.0001 |  |  |  |  |  |  |
| X1 | 1431.12 | 1 | 1431.12 | 1700.83 | < 0.0001 |  |  |  |  |  |  |
| X2 | 4.06 | 1 | 4.06 | 4.83 | 0.0640 |  |  |  |  |  |  |
| X3 | 13.26 | 1 | 13.26 | 15.76 | 0.0054 |  |  |  |  |  |  |
| X12 | 210.60 | 1 | 210.60 | 250.29 | < 0.0001 |  |  |  |  |  |  |
| X22 | 12.64 | 1 | 12.64 | 15.02 | 0.0061 |  |  |  |  |  |  |
| X32 | 112.81 | 1 | 112.81 | 134.07 | < 0.0001 |  |  |  |  |  |  |
| **Residual** | 5.89 | 7 | 0.8414 |  |  |  |  |  |  |  |  |
| Lack of Fit | 5.17 | 6 | 0.8617 | 1.20 | 0.6041 |  |  |  |  |  |  |
| Pure Error | 0.7200 | 1 | 0.7200 |  |  |  |  |  |  |  |  |
| **Cor Total** | 1727.43 | 13 |  |  |  |  |  |  |  |  |  |

**Table S2:** Results of regression analysis for responses Y1 (VS), Y2 (ZP) and Y3 (EE %).

|  | Model | Adequate precision | R2 | Adjusted R2 | Predicted R2 | SD | %CV | *P*-value |
| --- | --- | --- | --- | --- | --- | --- | --- | --- |
| Y1 (VS) | Reduced cubic | 42.4116 | 0.9966 | 0.9926 | 0.9759 | 4.50 | 2.71 | < 0.0001 |
| Y2 (ZP) | Reduced Quadratic | 78.8138 | 0.9975 | 0.9964 | 0.9935 | 0.3763 | 1.65 | < 0.0001 |
| Y3 (EE %) | Reduced Quadratic | 50.4143 | 0.9966 | 0.9937 | 0.9864 | 0.9173 | 1.99 | < 0.0001 |

**Figure S1:** Plot of actual versus Design Expert® predicted CT-CS-LPs PS, ZP, and EE.

**
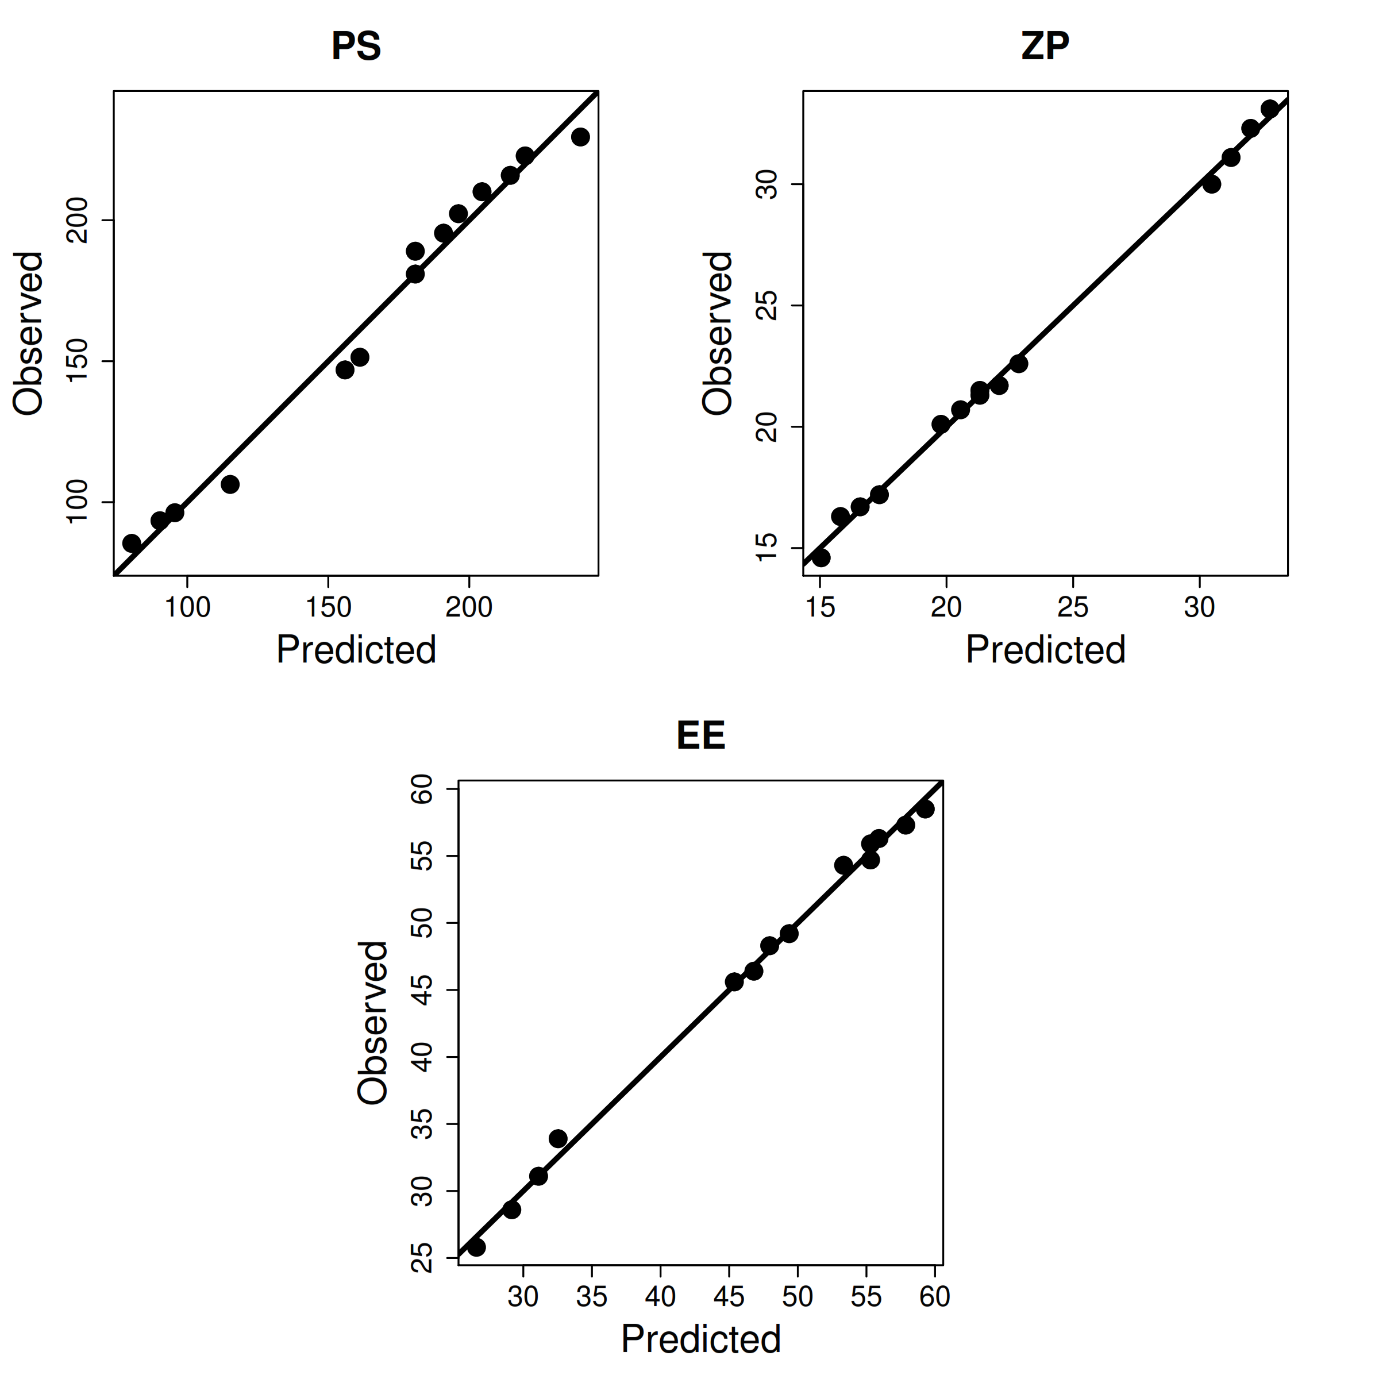
**

**Figure S2:** Normal quantile-quantile plots of residual errors.

**
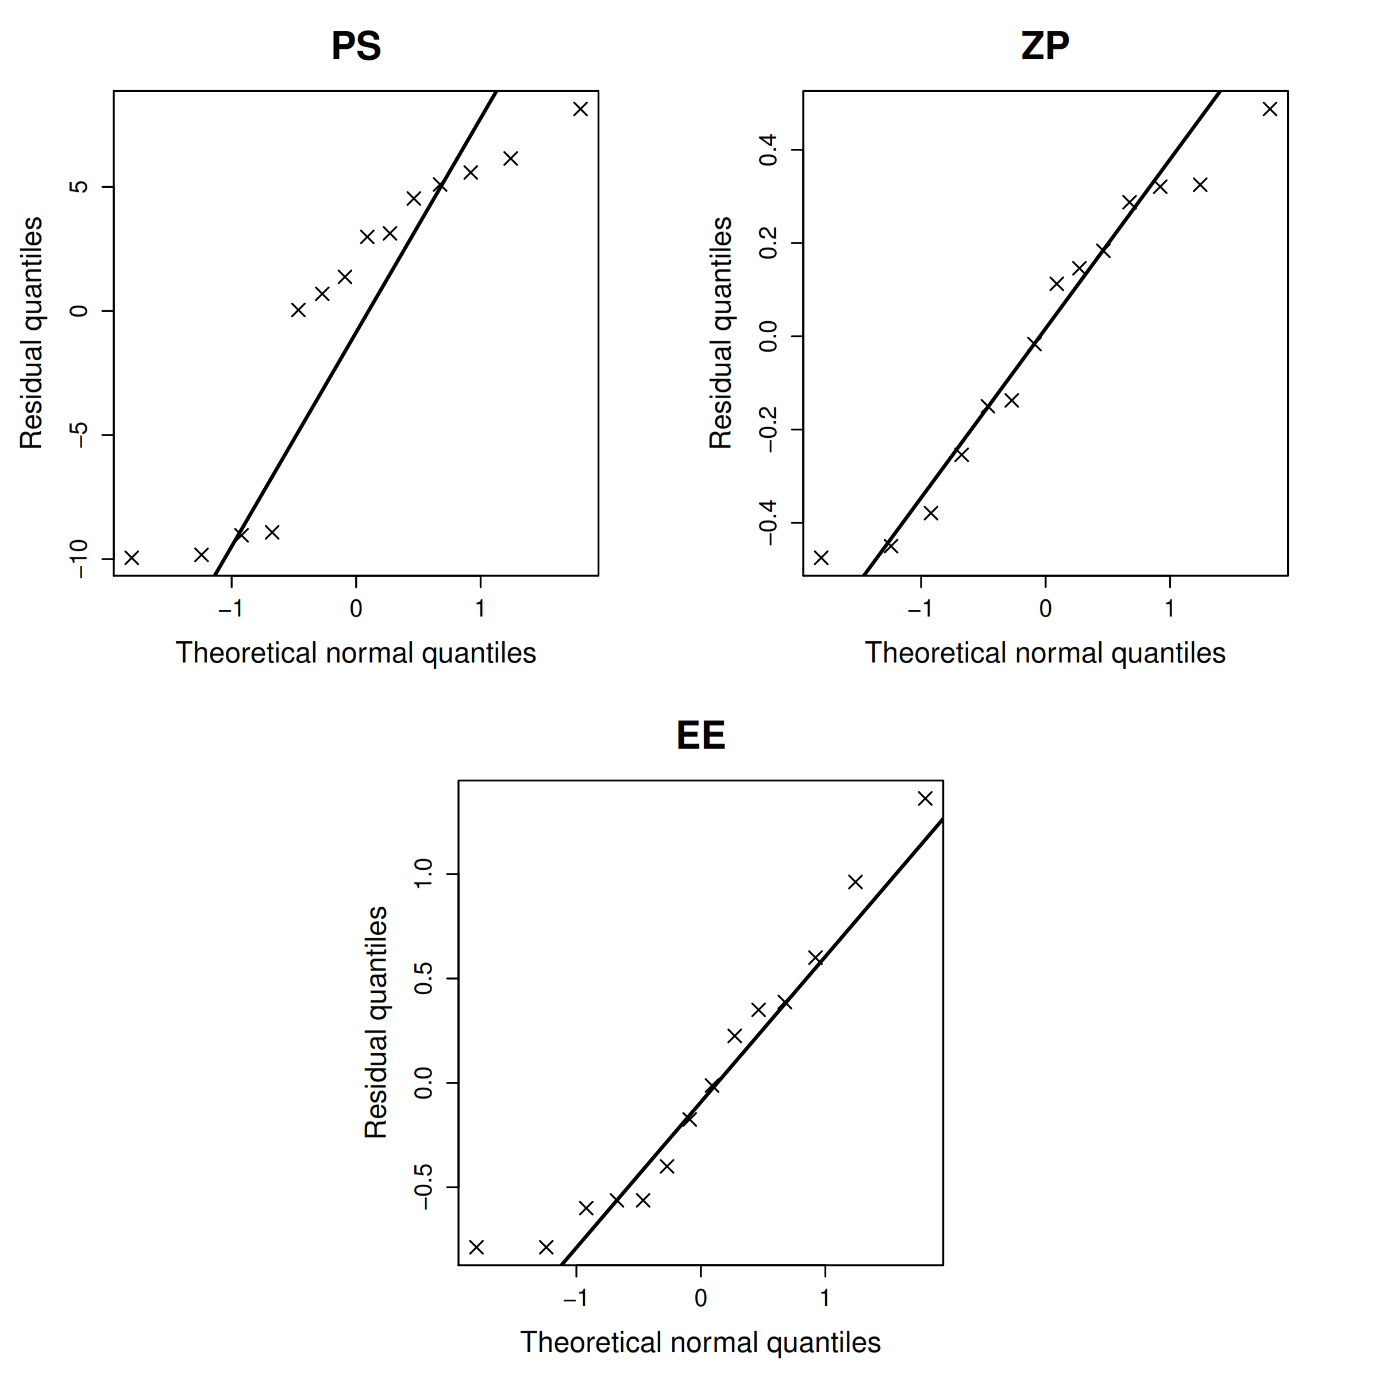
**

**Figure S3:** Plot of residual error versus model predicted responses.

**
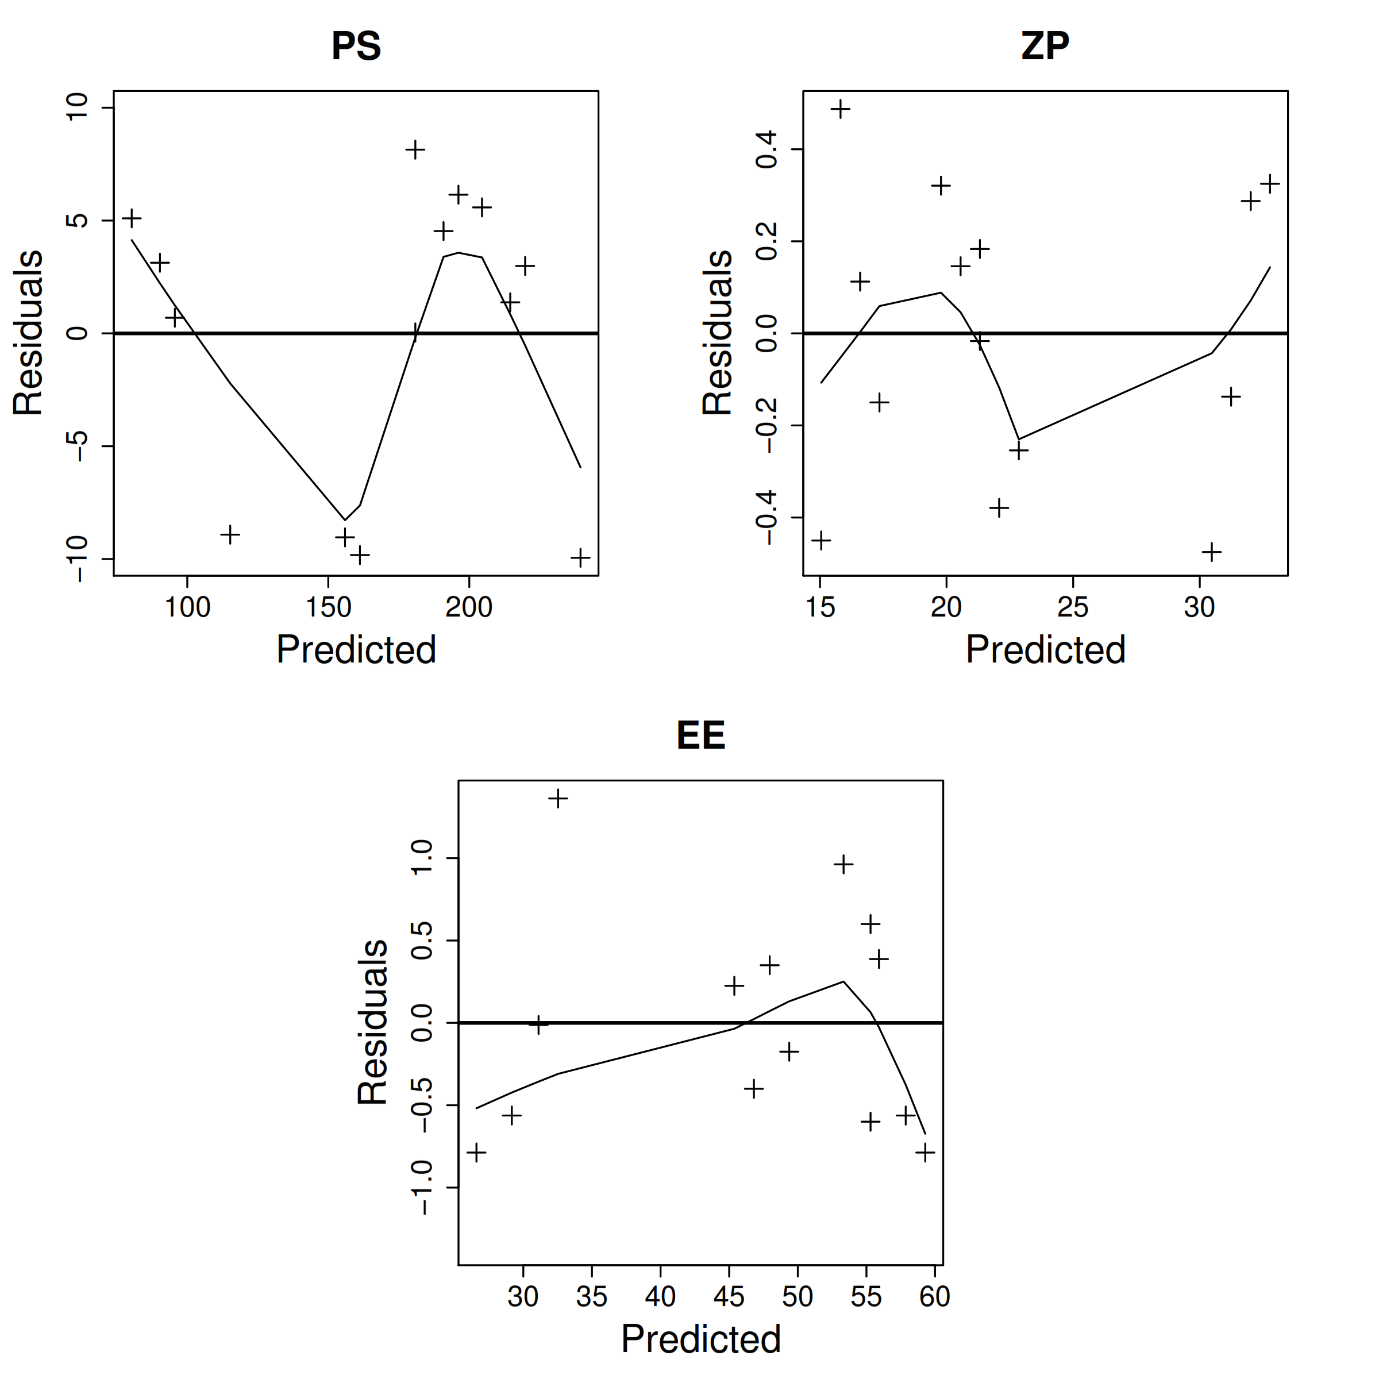
**

**Figure S4:** Fourier transform-infrared spectra of (a) Citicoline, (b) Cholesterol, (c) Lecithin, (d) Chitosan, (e) Cholesterol, lecithin, and chitosan physical mixture, and (f) CT-CS-LPs optimized formula.


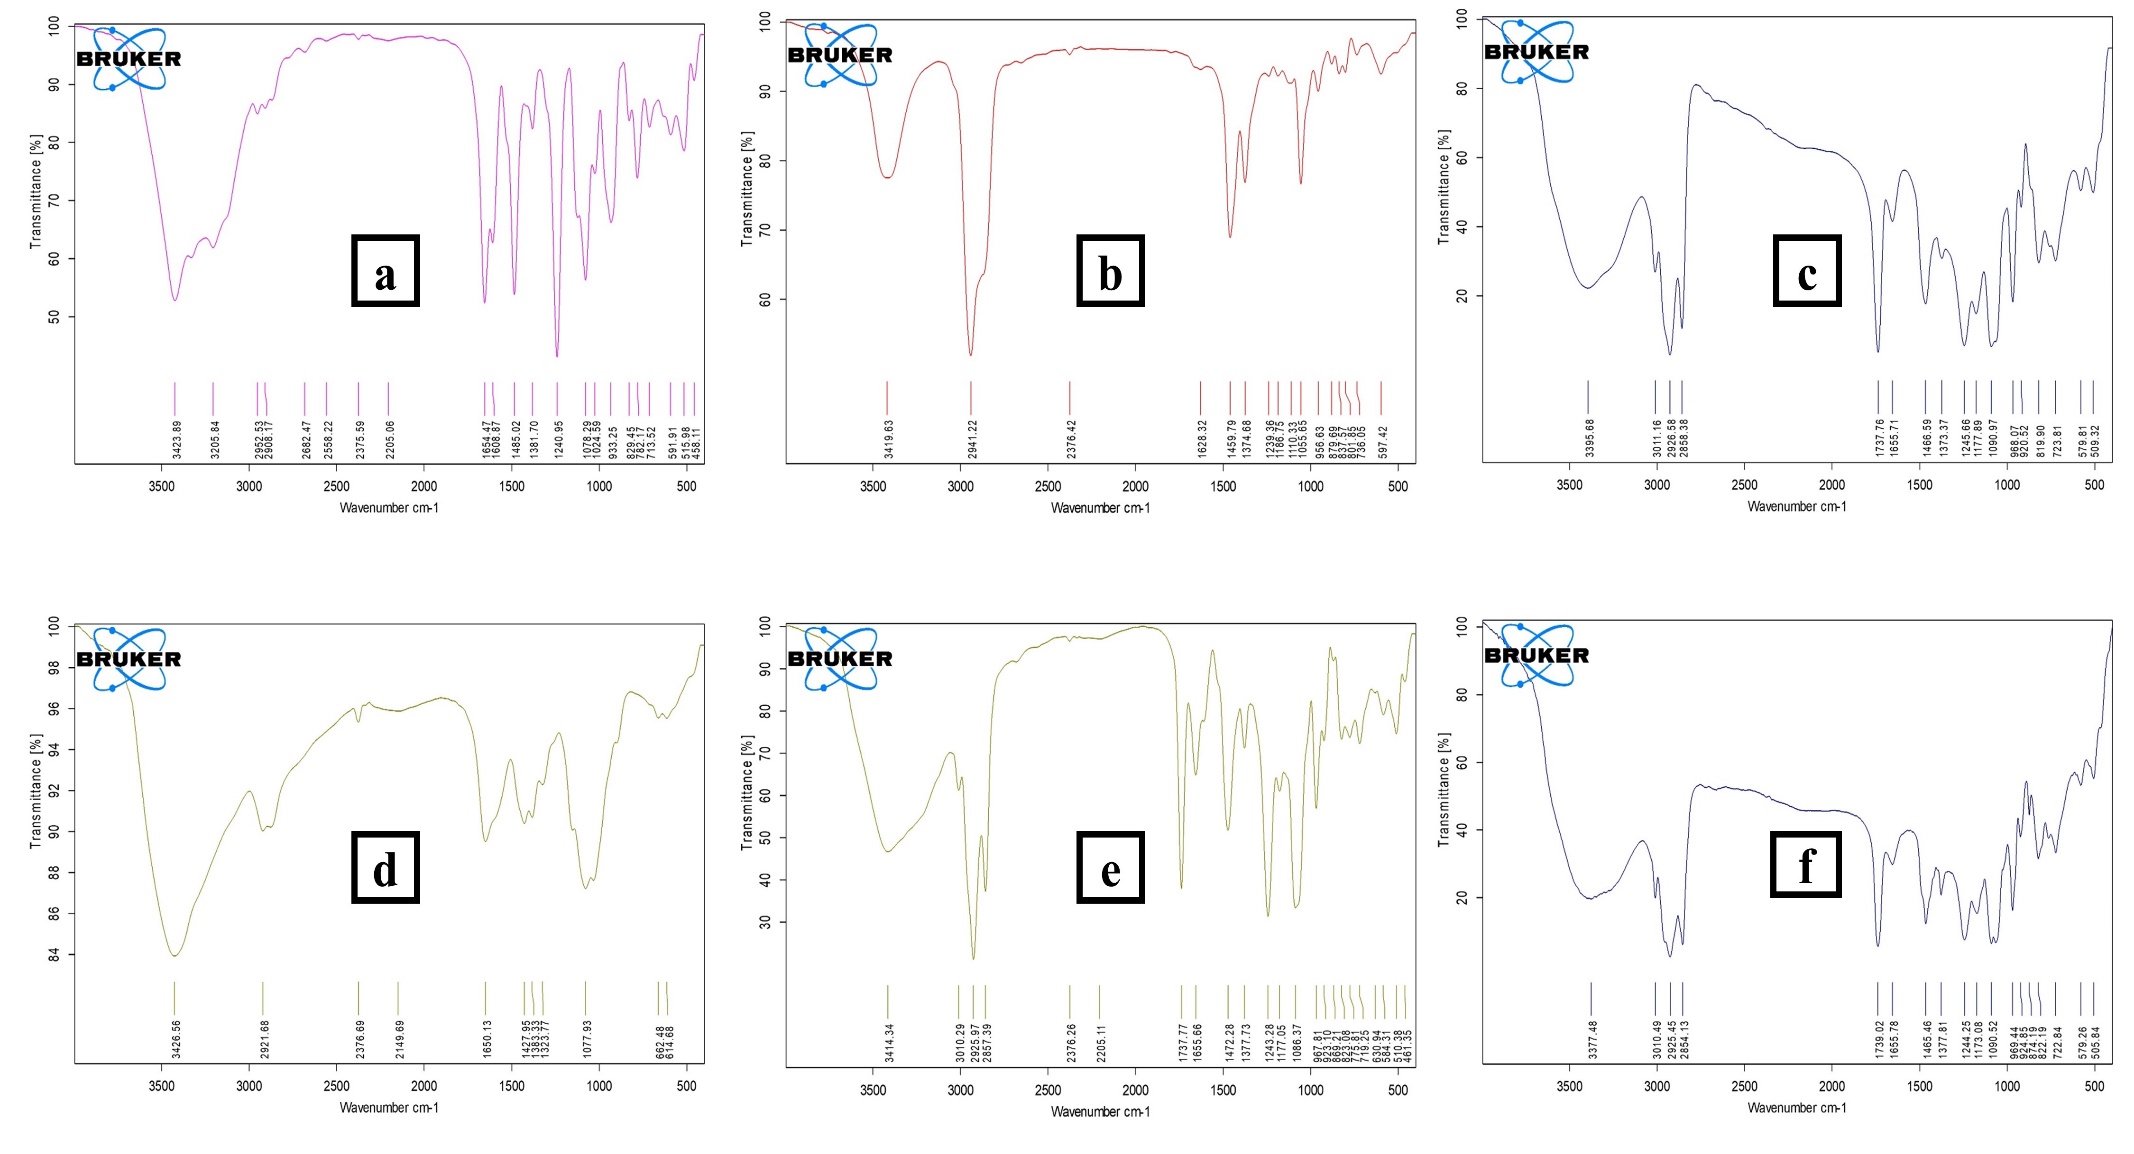

Supplement: Supplementary file 1 [file get_supplementary_file.php]
